# Supplementary material for: CD147-Cyclophilin a Interactions Promote Proliferation and Survival of Cutaneous T-Cell Lymphoma
Source: MDPI journal article supplement (doi:10.3390/ijms22157889), 2021-07-23
Supplement: s1 [file s1]

Supplementary Table S1.

| Case | Age | Sex | Diagnosis         | Stage                     | RT-PCR | ELISA | IHC | Flow cytometry |
|------|-----|-----|-------------------|---------------------------|--------|-------|-----|----------------|
| 1    | 82  | F   | Mycosis fungoides | IA (Patch)                | ○      |       |     |                |
| 2    | 58  | M   | Mycosis fungoides | IA (Patch)                | ○      |       |     |                |
| 3    | 68  | F   | Mycosis fungoides | IA (Patch)                | ○      |       |     |                |
| 4    | 83  | M   | Mycosis fungoides | IA (Patch)                | ○      |       |     |                |
| 5    | 62  | F   | Mycosis fungoides | IA (Patch)                |        | ○     |     |                |
| 6    | 51  | M   | Mycosis fungoides | IA (Patch)                |        | ○     |     |                |
| 7    | 80  | M   | Mycosis fungoides | IA (Patch)                |        | ○     |     |                |
| 8    | 22  | M   | Mycosis fungoides | IA (Patch)                |        | ○     |     |                |
| 9    | 39  | F   | Mycosis fungoides | IA (Patch)                |        | ○     |     |                |
| 10   | 63  | M   | Mycosis fungoides | IA (Patch)                |        | ○     |     |                |
| 11   | 36  | F   | Mycosis fungoides | IA (Patch)                |        | ○     |     |                |
| 12   | 59  | M   | Mycosis fungoides | IA (Patch)                |        |       | ○   |                |
| 13   | 50  | F   | Mycosis fungoides | IA (Plaque)               | ○      |       |     |                |
| 14   | 27  | F   | Mycosis fungoides | IA (Plaque)               |        | ○     |     |                |
| 15   | 61  | M   | Mycosis fungoides | IA (Plaque)               |        | ○     | ○   |                |
| 16   | 54  | M   | Mycosis fungoides | IB (Patch)                | ○      |       |     |                |
| 17   | 56  | F   | Mycosis fungoides | IB (Patch)                | ○      |       |     |                |
| 18   | 67  | F   | Mycosis fungoides | IB (Patch)                |        | ○     |     |                |
| 19   | 74  | M   | Mycosis fungoides | IB (Plaque)               | ○      |       |     |                |
| 20   | 68  | M   | Mycosis fungoides | IB (Plaque)               | ○      |       |     |                |
| 21   | 70  | M   | Mycosis fungoides | IB (Plaque)               | ○      |       |     |                |
| 22   | 78  | F   | Mycosis fungoides | IB (Plaque)               |        | ○     |     |                |
| 23   | 68  | F   | Mycosis fungoides | IB (Plaque)               |        | ○     | ○   |                |
| 24   | 24  | M   | Mycosis fungoides | IB (Plaque)               |        | ○     |     |                |
| 25   | 37  | M   | Mycosis fungoides | IB (Plaque)               |        | ○     |     |                |
| 26   | 76  | F   | Mycosis fungoides | IB (Plaque)               |        | ○     |     |                |
| 27   | 52  | M   | Mycosis fungoides | IB (Plaque)               |        | ○     |     |                |
| 28   | 34  | M   | Mycosis fungoides | IB (Plaque)               |        | ○     |     |                |
| 29   | 52  | M   | Mycosis fungoides | IB (Plaque)               |        | ○     |     |                |
| 30   | 53  | F   | Mycosis fungoides | IB (Plaque)               |        |       | ○   |                |
| 31   | 40  | M   | Mycosis fungoides | IIB (Plaque)              |        | ○     |     |                |
| 32   | 75  | M   | Mycosis fungoides | IIB (Plaque)              |        | ○     | ○   |                |
| 33   | 40  | M   | Mycosis fungoides | IIB (Tumor)               | ○      |       |     |                |
| 34   | 63  | M   | Mycosis fungoides | IIB (Tumor)               | ○      |       |     |                |
| 35   | 45  | M   | Mycosis fungoides | IIB (Tumor)               | ○      | ○     | ○   |                |
| 36   | 44  | M   | Mycosis fungoides | IIB (Tumor)               | ○      |       | ○   |                |
| 37   | 60  | F   | Mycosis fungoides | IIB (Tumor)               | ○      |       |     |                |
| 38   | 65  | F   | Mycosis fungoides | IIB (Tumor)               | ○      |       | ○   |                |
| 39   | 79  | M   | Mycosis fungoides | IIB (Tumor)               |        | ○     |     |                |
| 40   | 78  | M   | Mycosis fungoides | IIB (Tumor)               |        | ○     | ○   |                |
| 41   | 63  | M   | Mycosis fungoides | IIB (Tumor)               |        | ○     |     |                |
| 42   | 56  | M   | Mycosis fungoides | IIB (Tumor)               |        |       | ○   |                |
| 43   | 42  | F   | Mycosis fungoides | IIB (Tumor)               |        |       | ○   |                |
| 44   | 64  | M   | Mycosis fungoides | IIB (Tumor)               |        |       | ○   |                |
| 45   | 40  | M   | Mycosis fungoides | IIIA (Patch-Erythroderma) | ○      |       | ○   |                |

|    |    |   |                   |                     |   |   |   |   |
|----|----|---|-------------------|---------------------|---|---|---|---|
| 46 | 63 | M | Mycosis fungoides | IIIA (Erythroderma) | ○ |   |   |   |
| 47 | 70 | F | Mycosis fungoides | IIIA (Erythroderma) | ○ |   |   |   |
| 48 | 72 | M | Mycosis fungoides | IIIA (Tumor)        |   | ○ |   |   |
| 49 | 72 | M | Mycosis fungoides | IIIA (Tumor)        |   | ○ |   |   |
| 50 | 67 | M | Mycosis fungoides | IIIA (Tumor)        |   | ○ |   |   |
| 51 | 55 | M | Mycosis fungoides | IIIA (Tumor)        |   | ○ |   |   |
| 52 | 38 | F | Mycosis fungoides | IIIA (Tumor)        |   | ○ |   |   |
| 53 | 69 | M | Mycosis fungoides | IIIA (Tumor)        |   | ○ |   |   |
| 54 | 47 | F | Mycosis fungoides | IIIA (Tumor)        |   | ○ |   |   |
| 55 | 77 | F | Mycosis fungoides | IIIA (Tumor)        |   | ○ |   |   |
| 56 | 73 | F | Mycosis fungoides | IIIA (Tumor)        |   | ○ |   |   |
| 57 | 53 | M | Mycosis fungoides | IIIA (Erythroderma) |   | ○ |   |   |
| 58 | 56 | M | Mycosis fungoides | IIIA (Erythroderma) |   | ○ |   |   |
| 59 | 62 | M | Mycosis fungoides | IIIA (Erythroderma) |   | ○ |   |   |
| 60 | 62 | M | Mycosis fungoides | IIIA (Erythroderma) |   | ○ |   |   |
| 61 | 42 | M | Sézary syndrome   | IVA1                | ○ | ○ | ○ |   |
| 62 | 64 | F | Sézary syndrome   | IVA1                | ○ |   |   |   |
| 63 | 78 | M | Sézary syndrome   | IVA1                |   | ○ | ○ |   |
| 64 | 74 | M | Sézary syndrome   | IVA1                |   | ○ | ○ | ○ |
| 65 | 69 | M | Sézary syndrome   | IVA1                |   | ○ |   |   |
| 66 | 77 | M | Sézary syndrome   | IVA1                |   | ○ |   |   |
| 67 | 55 | M | Sézary syndrome   | IVA1                |   |   |   | ○ |
| 68 | 70 | M | Sézary syndrome   | IVA1                |   |   |   | ○ |
| 69 | 52 | M | Sézary syndrome   | IVA2                |   | ○ | ○ |   |
| 70 | 61 | F | Sézary syndrome   | IVA2                |   |   |   | ○ |
| 71 | 43 | M | Mycosis fungoides | IVB (Tumor)         |   |   | ○ |   |
| 72 | 58 | F | Sézary syndrome   | IVB                 | ○ |   |   |   |
| 73 | 67 | M | Sézary syndrome   | IVB                 | ○ |   | ○ |   |
| 74 | 52 | M | Sézary syndrome   | IVB                 |   | ○ |   |   |
